# Supplementary material for: Insight into the complexation mechanism between a BiVO4photoanode and tartaric acid for efficient photoelectrochemical H2production
Source: Royal Society of Chemistry journal article supplement (doi:10.1039/d3qi01101a), 2023-01-01
Supplement: d3qi01101a1.pdf [file d3qi01101a1.pdf]

## Supporting information

### Insight into a complexation mechanism between BiVO<sub>4</sub> photoanode and tartaric acid for efficient photoelectrochemical H<sub>2</sub> production

Zhaoqi Wang<sup>a</sup>, Shuhua Wang<sup>b</sup>, Xiaolei Liu<sup>a,\*</sup>, Yayang Xu<sup>a</sup>, Dajuan Dai<sup>a</sup>, Shuang Zhao<sup>a</sup>,  
Peng Wang<sup>a</sup>, Zhaoke Zheng<sup>a</sup>, Yuanyuan Liu<sup>a</sup>, Hefeng Cheng<sup>a</sup>, Ying Dai<sup>b</sup>, Zeyan  
Wang<sup>a,\*</sup>, Baibiao Huang<sup>a,\*</sup>

<sup>a</sup> State Key Laboratory of Crystal Materials, Shandong University, Jinan 250100, China

<sup>b</sup> School of Physics, Shandong University, Jinan 250100, China

\*Corresponding authors' e-mail addresses: [liuxiaolei@sdu.edu.cn](mailto:liuxiaolei@sdu.edu.cn) (X. Liu);  
[wangzeyan@sdu.edu.cn](mailto:wangzeyan@sdu.edu.cn) (Z. Wang); [bbhuang@sdu.edu.cn](mailto:bbhuang@sdu.edu.cn) (B. Huang)

## **Experimental section**

### **Fabrication of ZnO photoanode**

The ZnO photoanode was synthesized using a hydrothermal method.<sup>1</sup> First, 0.44 g of zinc nitrate hexahydrate and 0.22 g of hexamethylenetetramine was dissolved in 60 ml of water and transferred to a 100 ml autoclave. An FTO glass substrate with an Al foil-covered edge was inserted into the autoclave with its conducting surface facing downwards. The autoclave was maintained at 90 °C for 4 h and cooled down naturally. The resulting photoanode was rinsed with water and ethanol before being left to dry overnight. The final product was a ZnO photoanode.

### **Fabrication of TiO<sub>2</sub> photoanode**

The TiO<sub>2</sub> photoanode was prepared using a hydrothermal method, as described in previous studies.<sup>2</sup> In brief, a white solution containing 30 ml of hydrochloric acid, 30 ml of water, and 1.0 ml of titanium n-butoxide was transferred into a autoclave along with an FTO glass (conducting surface down). The autoclave was then maintained at 150 °C for 5 h, followed by a natural cooling process. The resulting sample was rinsed with water and dried, and subsequently annealed at 550 °C for 4 h. Finally, the TiO<sub>2</sub> photoanode was obtained.

### **Fabrication of WO<sub>3</sub> photoanode**

The WO<sub>3</sub> photoanode was synthesized via a hydrothermal and annealing process.<sup>3</sup> Initially, 0.5 g of sodium tungstate dihydrate was dissolved in 60 ml of water and vigorously stirred. Next, 12 ml of 3.0 M hydrochloric acid and 0.4 g of ammonium oxalate were added to the solution and stirred vigorously again. The resulting solution was transferred to a 100 ml autoclave containing an upside-down FTO substrate. The autoclave was then heated to 120 °C for 12 h before being allowed to cool naturally. The obtained product was rinsed with water and dried at 60 °C for 5 h. The sample was then annealed at 500 °C for 1 h. Finally, the WO<sub>3</sub> photoanode was finally obtained after cooling the sample.

### **Characterizations**

The structures and morphologies of the prepared photoanodes were characterized using X-ray diffraction (XRD, Bruker D8-Advance) and scanning electron microscopy (SEM, Hitachi S-4800). Ultraviolet-visible diffuse reflectance spectroscopy (UV-Vis DRS) measurements of the photoanodes were performed by a UV-vis spectrophotometer (Shimadzu 2550) equipped with an integrating sphere, with BaSO<sub>4</sub> serving as the reference material. The elements chemical states and chemical environment of the prepared photoanodes were determined by X-ray photoelectron spectroscopy (XPS, Thermo Fisher Scientific Escalab Xi+) using a monochromatic Al-K $\alpha$  source. The C1s peak at 284.8 eV was used to calibrated the peak positions of the measured elements.

### Calculation details

The first-principles density functional theory (DFT) simulations were performed utilizing Vienna *ab initio* simulation package with the generalized gradient approximation (GGA) and Perdew-Burke-Ernzerhof (PBE) exchange-correlation function.<sup>4-6</sup> To illustrate the interaction between valence electrons and ionic cores, the projected augmented wave (PAW) potentials with a plane wave basis set were adopted, while the kinetic cut-off energy was set to 450 eV.<sup>7, 8</sup> To determine the partial occupancies of Kohn-Sham orbitals, the Gaussian smearing method with a width of 0.05 eV were used. The electronic energy was reckoned as self-consistent under the condition that the energy change is within 10<sup>-5</sup> eV and the geometry optimization of atomic structure was reckoned as convergent under the condition that the energy change is within 0.05 eV Å<sup>-1</sup>. The vacuum spacing is 20 Å for the surface system in the direction that perpendicular to plane. The Brillouin zone integration were performed by a 4×5×1 k-points sampling under the Monkhorst-Pack scheme. And the adsorption energy ( $E_{ad}$ ) were calculated by the follow equation:

$$E_{ads} = E_{ad-sub} - E_{ad} - E_{sub}$$

Where  $E_{ad-sub}$  is the total energy of the optimized system,  $E_{ad}$  is the energy of adsorbate and the  $E_{sub}$  is the energy of substrate.

## Supplementary data

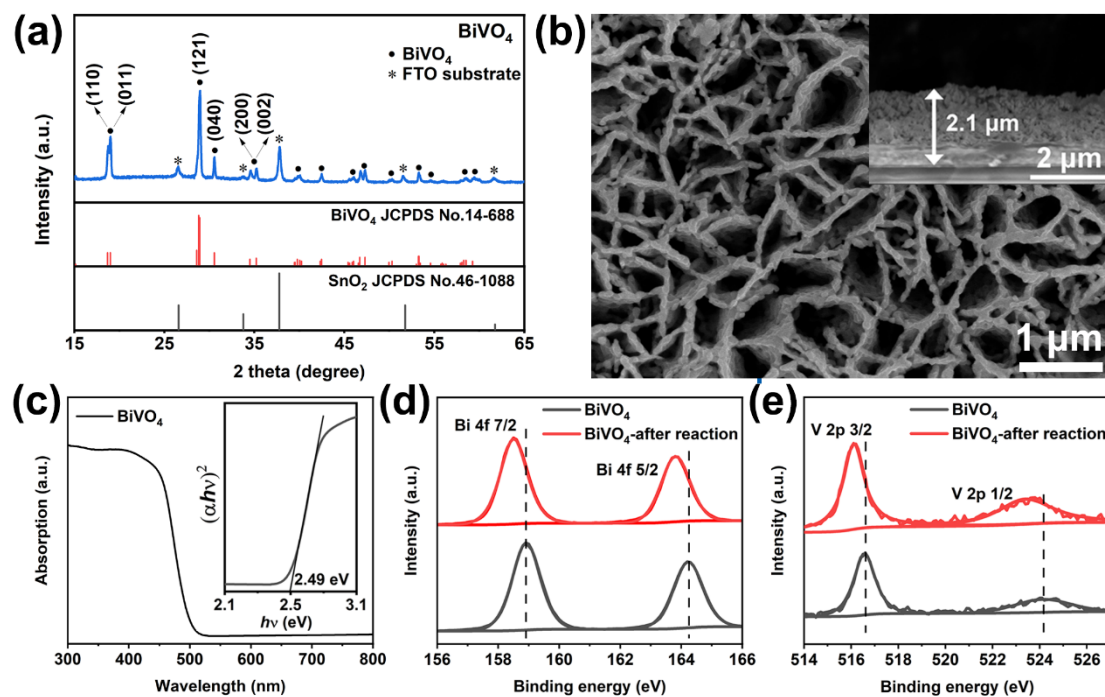

**Fig. S1** (a) XRD pattern, (b) top and the inserted cross-sectional view SEM images, (c) UV-Vis DRS spectrum and the inserted Tauc-plot of the BiVO<sub>4</sub> photoanode. (d) Bi 4f and (e) V 2p XPS peaks of the BiVO<sub>4</sub> photoanode before and after the PEC test in KPi + 0.5 M C<sub>4</sub>H<sub>6</sub>O<sub>6</sub> solution.

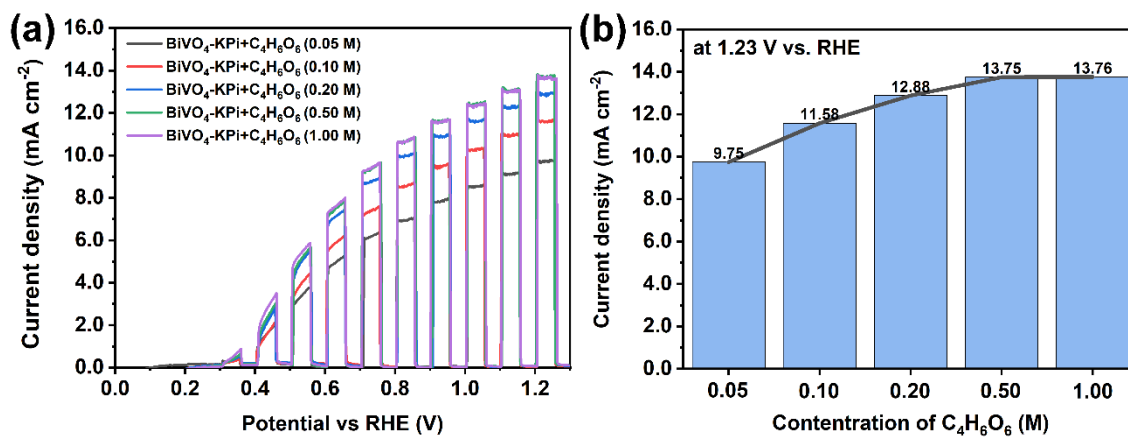

**Fig. S2** (a) Current density-potential (J-p) curves of the BiVO<sub>4</sub> photoanode under AM 1.5 G irradiation or in the dark in KPi + C<sub>4</sub>H<sub>6</sub>O<sub>6</sub> solution with different concentrations of C<sub>4</sub>H<sub>6</sub>O<sub>6</sub>. (b) Current density of the BiVO<sub>4</sub> photoanode at 1.23 V versus RHE in KPi + 0.5 M C<sub>4</sub>H<sub>6</sub>O<sub>6</sub> solution with different concentrations of C<sub>4</sub>H<sub>6</sub>O<sub>6</sub>.

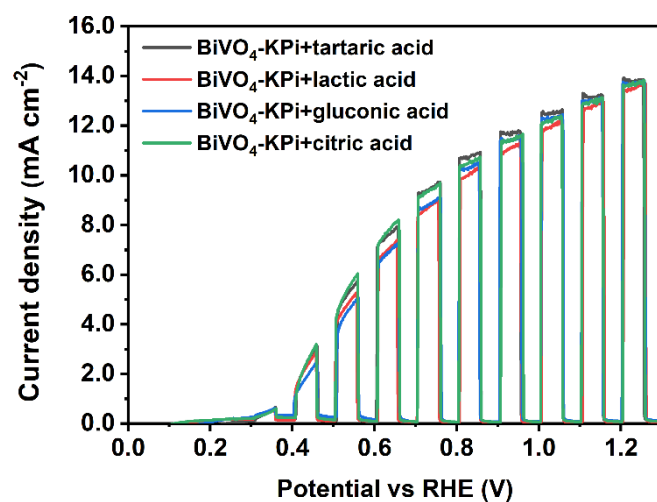

**Fig. S3** J-p curves of the BiVO<sub>4</sub> photoanode under AM 1.5 G irradiation or in the dark in KPi + 0.5 M tartaric acid (C<sub>4</sub>H<sub>6</sub>O<sub>6</sub>), KPi + 0.5 M lactic acid, KPi + 0.5 M gluconic acid, and KPi + 0.5 M citric acid solutions.

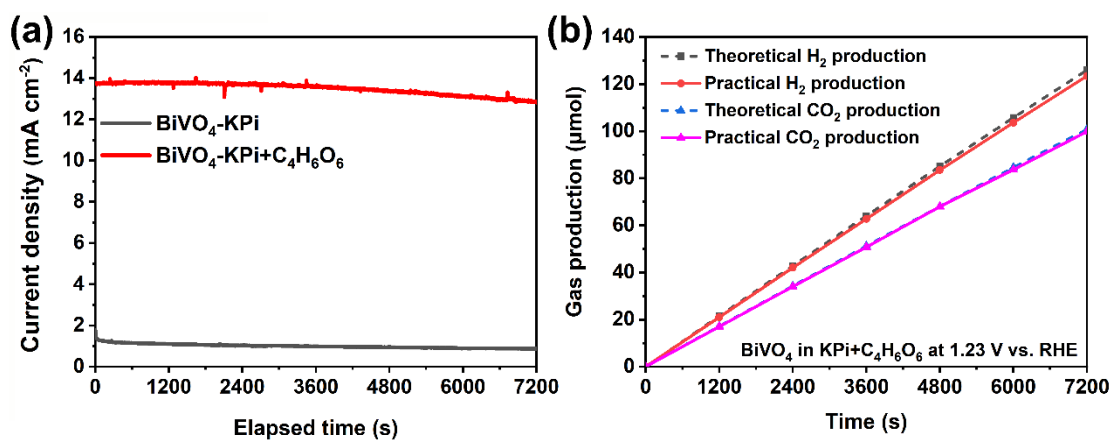

**Fig. S4** (a) Current density-time (J-t) curves of the BiVO<sub>4</sub> photoanode measured at 1.23 V versus RHE in KPi and KPi + 0.5 M C<sub>4</sub>H<sub>6</sub>O<sub>6</sub> solutions. (b) Theoretical and practical H<sub>2</sub> and CO<sub>2</sub> production of the BiVO<sub>4</sub> photoanode measured at 1.23 V versus RHE in KPi + 0.5 M C<sub>4</sub>H<sub>6</sub>O<sub>6</sub> solution.

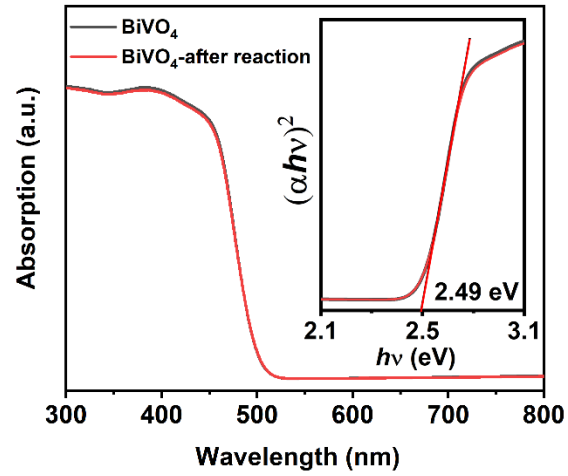

**Fig. S5** UV-vis DRS spectrum and the inserted Tauc-plot of the BiVO<sub>4</sub> photoanode before and after the PEC test in KPi + 0.5 M C<sub>4</sub>H<sub>6</sub>O<sub>6</sub> solution.



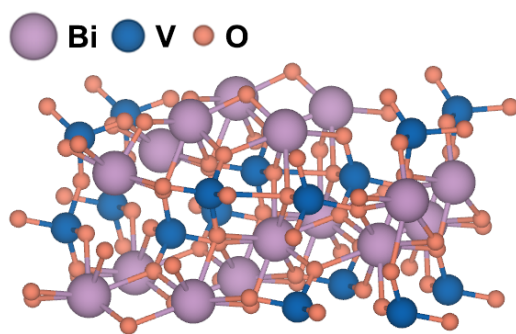

**Fig. S6** Simulated structure of the BiVO<sub>4</sub> (121) surface after geometric optimization (the purple, blue and orange spheres represent Bi, V, and O atoms in turn).

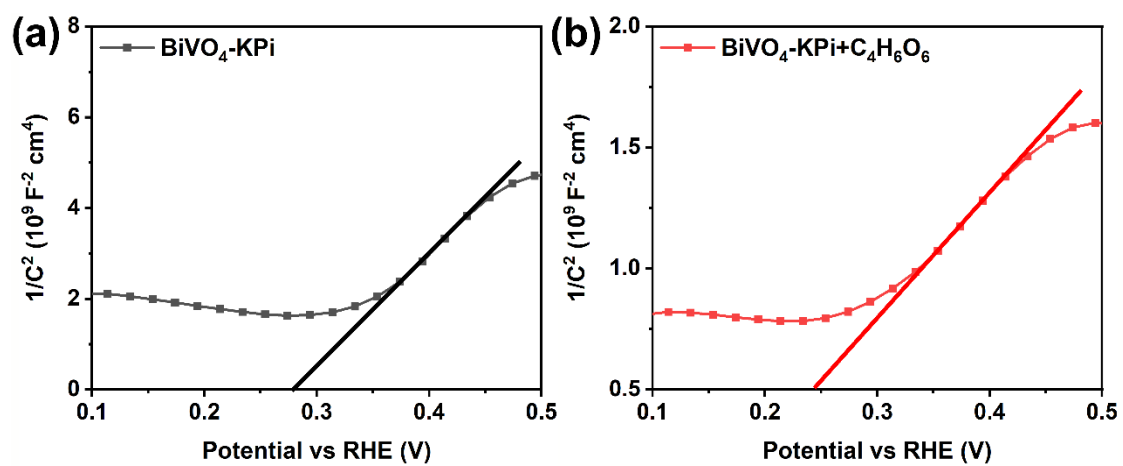

**Fig. S7** Mott-Schottky plots of the BiVO<sub>4</sub> photoanode in (a) KPi and (b) KPi + 0.5 M C<sub>4</sub>H<sub>6</sub>O<sub>6</sub> solutions.

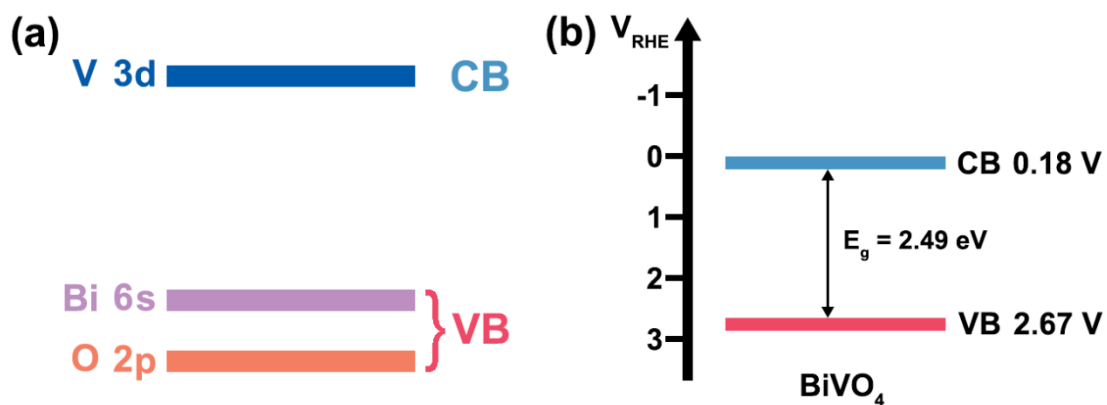

**Fig. S8** Schematic diagram of (a) the band structure and (b) the band positions of BiVO<sub>4</sub>.

In the case of an n-type semiconductor, it is generally accepted that the flat band potential obtained by Mott-Schottky measurement is assumed to be situated at approximately 0.1 eV below the CB.<sup>1</sup> The flat band potential of BiVO<sub>4</sub> photoanode obtained from Mott-Schottky measurement is 0.28 V vs. RHE. Therefore, the CB position of BiVO<sub>4</sub> is calculated to be 0.18 V vs. RHE. Moreover, the bandgap of BiVO<sub>4</sub> obtained by Tauc-plot is 2.49 eV. Finally, the VB position of BiVO<sub>4</sub> is determined to be 2.67 V vs. RHE.

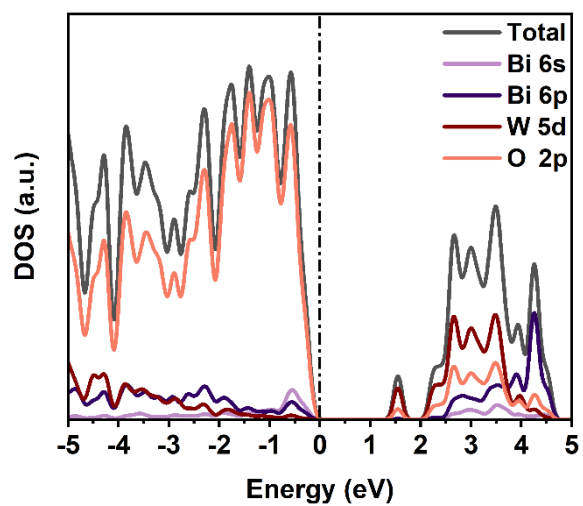

**Fig. S9** (a) Total DOS (TDOS) and partial DOS (PDOS) of  $\text{Bi}_2\text{WO}_6$ .

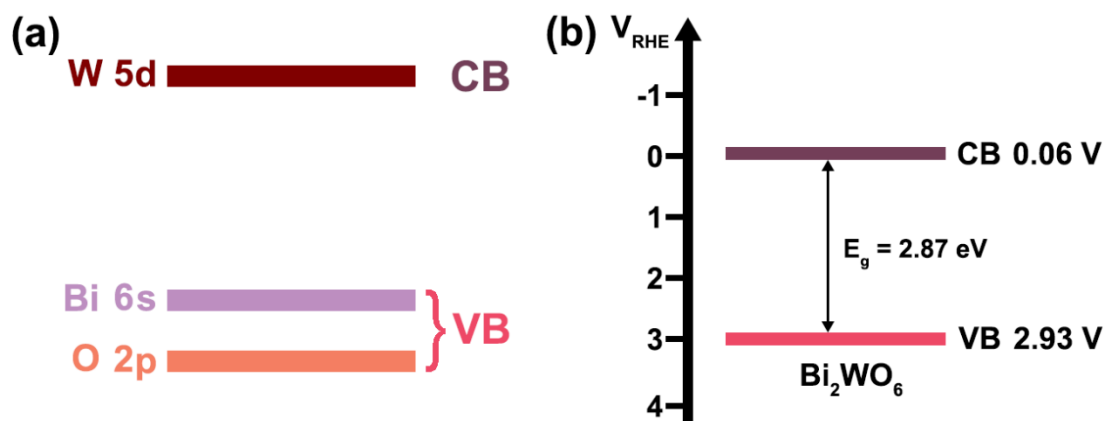

**Fig. S10** Schematic diagram of (a) the band structure and (b) the band positions of  $\text{Bi}_2\text{WO}_6$ .

The flat band potential of  $\text{Bi}_2\text{WO}_6$  photoanode obtained from Mott-Schottky measurement is 0.16 V vs. RHE. Therefore, the CB position of  $\text{Bi}_2\text{WO}_6$  is calculated to be 0.06 V vs. RHE. Moreover, the bandgap of  $\text{Bi}_2\text{WO}_6$  obtained by Tauc-plot is 2.87 eV. Finally, the VB position of  $\text{Bi}_2\text{WO}_6$  is determined to be 2.93 V vs. RHE.

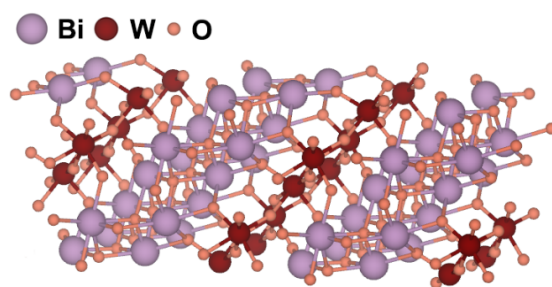

**Fig. S11** Simulated structure of the Bi<sub>2</sub>WO<sub>6</sub> (026) surface after geometric optimization (the purple, crimson, and orange spheres represent Bi, W, and O atoms in turn).

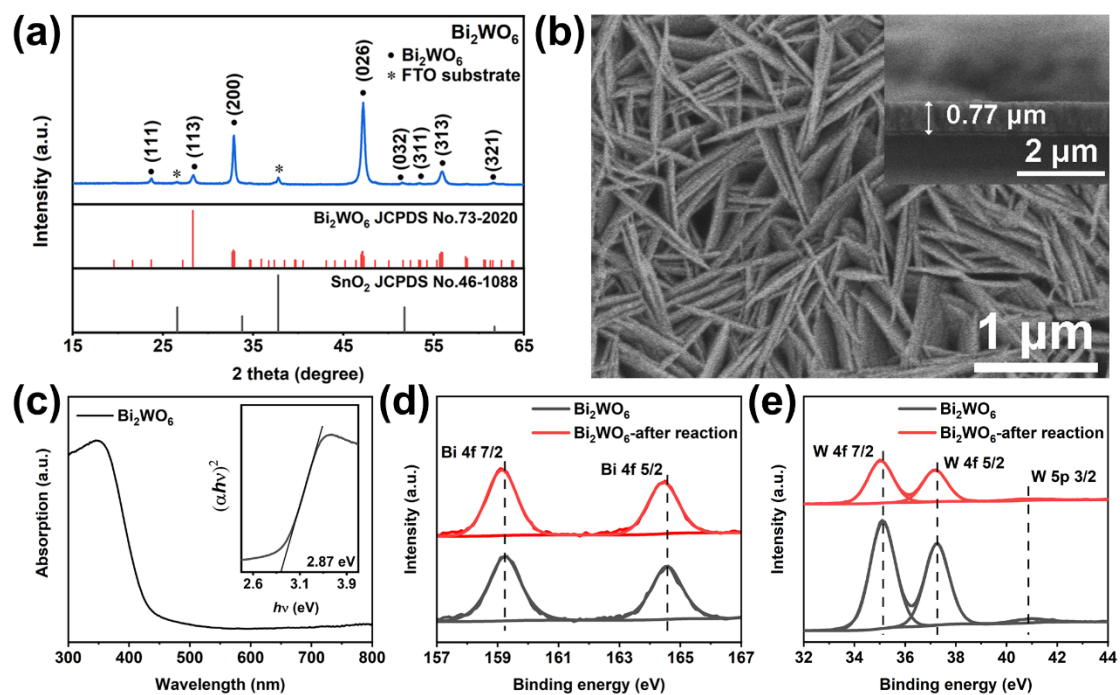

**Fig. S12** (a) XRD pattern, (b) top and the inserted cross-sectional view SEM images, (c) UV-vis DRS spectrum and the inserted Tauc-plot of the Bi<sub>2</sub>WO<sub>6</sub> photoanode. (d) Bi 4f and (e) W 4f and W 5p XPS peaks of the Bi<sub>2</sub>WO<sub>6</sub> photoanode before and after the PEC test in KPi + 0.5 M C<sub>4</sub>H<sub>6</sub>O<sub>6</sub> solution.

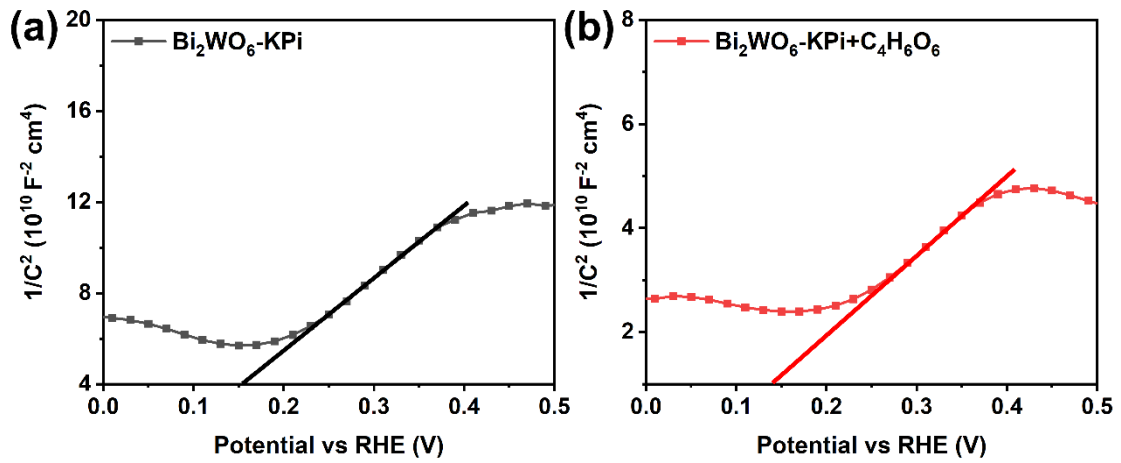

**Fig. S13** Mott-Schottky plots of the Bi<sub>2</sub>WO<sub>6</sub> photoanode in (a) KPi and (b) KPi + 0.5 M C<sub>4</sub>H<sub>6</sub>O<sub>6</sub> solutions.

The calculated donor densities ( $N_d$ ) of Bi<sub>2</sub>WO<sub>6</sub> photoanode in KPi and KPi + C<sub>4</sub>H<sub>6</sub>O<sub>6</sub> solutions are  $8.27 \times 10^{18}$  and  $2.04 \times 10^{19} \text{ cm}^{-3}$ , respectively.



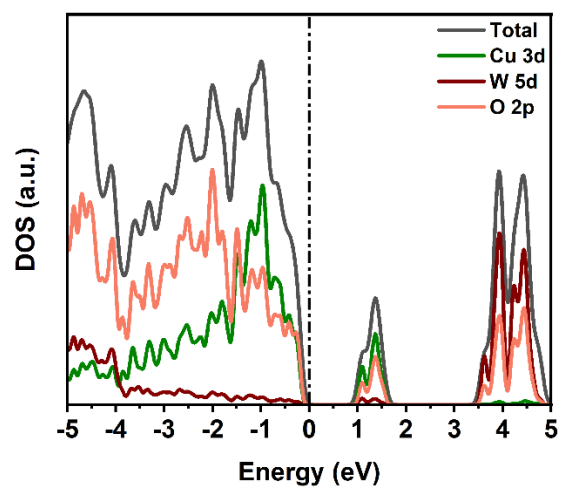

**Fig. S14** TDOS and PDOS of CuWO<sub>4</sub>.

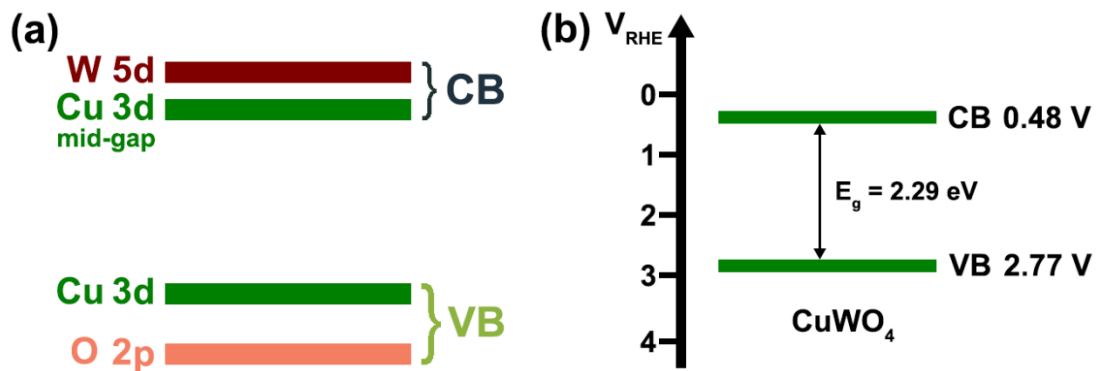

**Fig. S15** Schematic diagram of (a) the band structure and (b) the band positions of CuWO<sub>4</sub>.

The flat band potential of CuWO<sub>4</sub> photoanode obtained from Mott-Schottky measurement is 0.58 V vs. RHE. Therefore, the CB position of CuWO<sub>4</sub> is calculated to be 0.48 V vs. RHE. Moreover, the bandgap of CuWO<sub>4</sub> obtained by Tauc-plot is 2.29 eV. Finally, the VB position of CuWO<sub>4</sub> is determined to be 2.77 V vs. RHE.

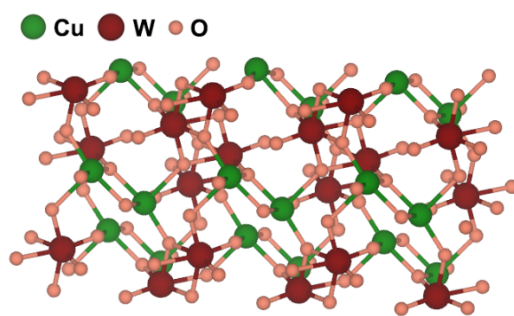

**Fig. S16** Simulated structure of the CuWO<sub>4</sub> (110) surface after geometric optimization (the green, crimson and orange spheres represent Cu, W, and O atoms in turn).

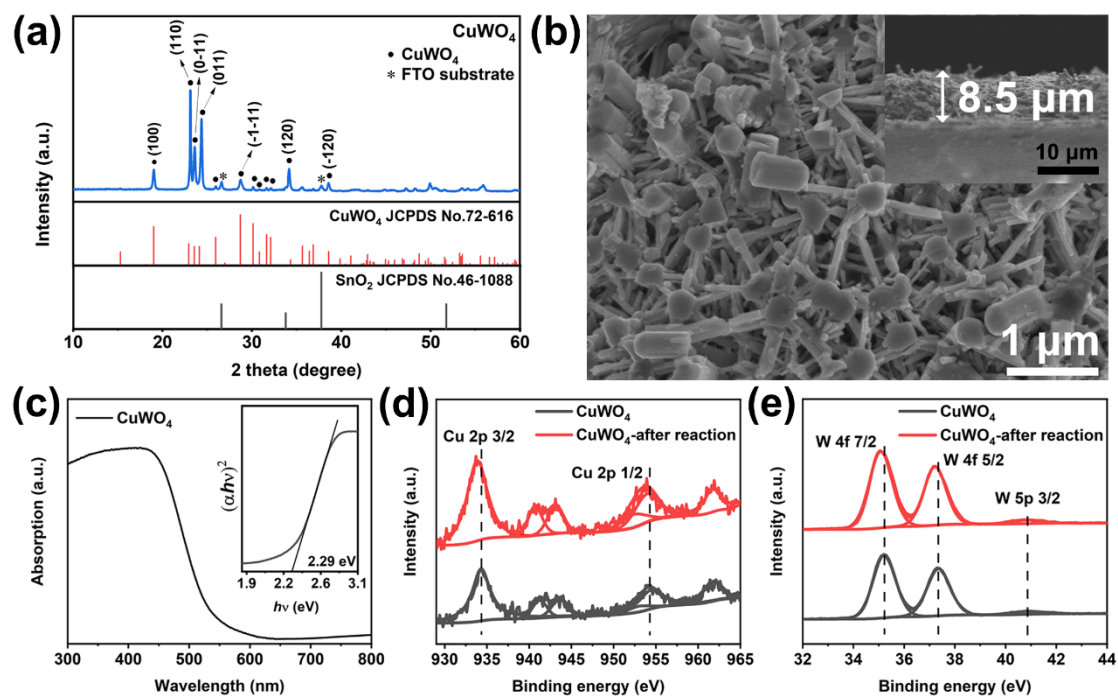

**Fig. S17** (a) XRD pattern, (b) top and the inserted cross-sectional view SEM images, (c) UV-vis DRS spectrum and the inserted Tauc-plot of the  $\text{CuWO}_4$  photoanode. (d) Cu 2p and (e) W 4f and W 5p XPS peaks of the  $\text{CuWO}_4$  photoanode before and after the PEC test in  $\text{KPi} + 0.5 \text{ M C}_4\text{H}_6\text{O}_6$  solution.

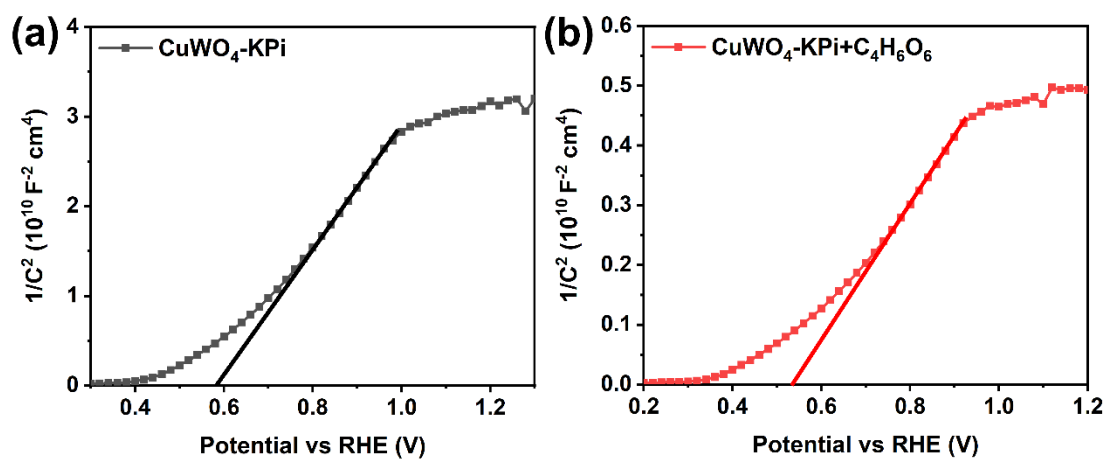

**Fig. S18** Mott-Schottky plots of the CuWO<sub>4</sub> photoanode in (a) KPi and (b) KPi + 0.5 M C<sub>4</sub>H<sub>6</sub>O<sub>6</sub> solutions.

The calculated  $N_d$  for CuWO<sub>4</sub> photoanode in KPi and KPi + C<sub>4</sub>H<sub>6</sub>O<sub>6</sub> solutions are  $2.30 \times 10^{19}$  and  $1.53 \times 10^{20} \text{ cm}^{-3}$ , respectively.

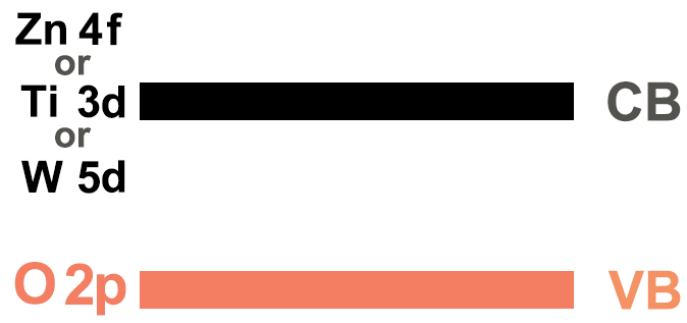

**Fig. S19** Schematic diagram of the band structure of ZnO, TiO<sub>2</sub>, and WO<sub>3</sub>.

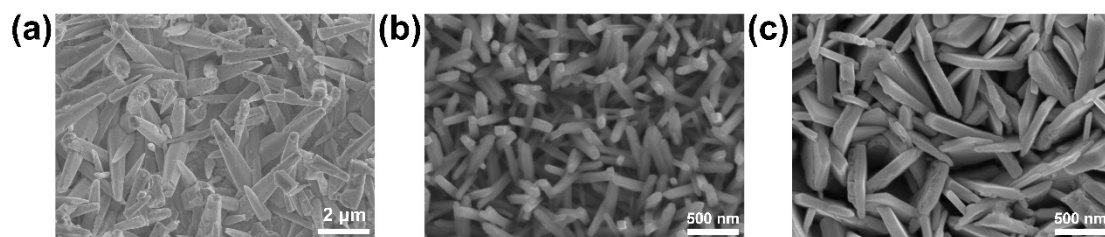

**Fig. S20** SEM images of the (a) ZnO, (b) TiO<sub>2</sub>, and (c) WO<sub>3</sub> photoanode.

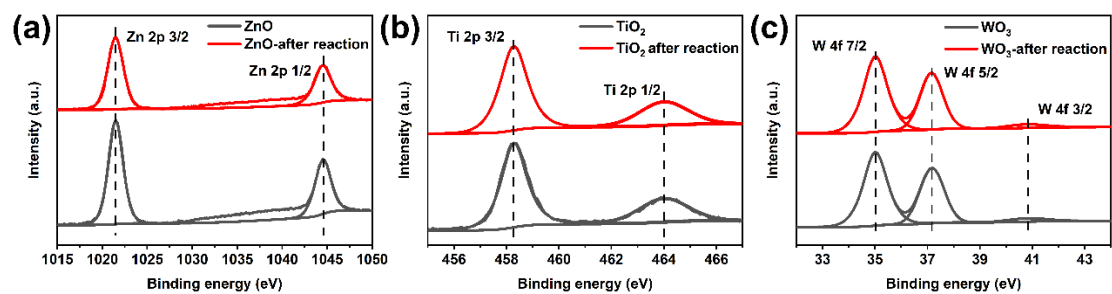

**Fig. S21** (a) Zn 2p XPS peaks of the ZnO photoanode, (b) Ti 2p XPS peaks of the TiO<sub>2</sub> photoanode, and (c) W 5p XPS peaks of the WO<sub>3</sub> photoanode before and after the PEC test in KPi + 0.5 M C<sub>4</sub>H<sub>6</sub>O<sub>6</sub> solution.



## References

1. Z. K. Zheng, Z. S. Lim, Y. Peng, L. You, L. Chen, J. L. Wang, General route to ZnO nanorod arrays on conducting substrates via galvanic-cell-based approach. *Sci. Rep.*, 2013, **3**, 2434.
2. G. M. Wang, H. Y. Wang, Y. C. Ling, Y. C. Tang, X. Y. Yang, R. C. Fitzmorris, C. C. Wang, J. Z. Zhang, Y. Li, Hydrogen-treated TiO<sub>2</sub> nanowire arrays for photoelectrochemical water splitting. *Nano Lett.*, 2011, **11** (7), 3026-3033.
3. Y. Y. Xu, M. Liu, F. X. Tong, F. H. Ma, X. Y. He, Z. Y. Wang, P. Wang, Y. Y. Liu, H. F. Cheng, Y. Dai, Z. K. Zheng, B. B. Huang, Strain-assisted in-situ formed oxygen defective WO<sub>3</sub> film for photothermal-synergistic reverse water gas shift reaction and single-particle study. *Chem. Eng. J.*, 2022, **433**, 134199.
4. G. Kresse, J. Furthmuller, Efficient iterative schemes for ab initio total-energy calculations using a plane-wave basis set. *Phys. Rev. B*, 1996, **54** (16), 11169-11186.
5. G. Kresse, J. Furthmuller, Efficiency of ab-initio total energy calculations for metals and semiconductors using a plane-wave basis set. *Comput. Mater. Sci.*, 1996, **6** (1), 15-50.
6. J. P. Perdew, K. Burke, M. Ernzerhof, Generalized gradient approximation made simple. *Phys. Rev. Lett.*, 1996, **77** (18), 3865-3868.
7. P. E. Blochl, Projector augmented-wave method. *Phys. Rev. B*, 1994, **50** (24), 17953-17979.
8. G. Kresse, D. Joubert, From ultrasoft pseudopotentials to the projector augmented-wave method. *Phys. Rev. B*, 1999, **59** (3), 1758-1775.
9. S. S. Kalanur, Y. J. Lee, H. Seo, A versatile synthesis strategy and band insights of monoclinic clinobisvanite BiVO<sub>4</sub> thin films for enhanced photoelectrochemical water splitting activity. *Appl. Surf. Sci.*, 2021, **562**, 150078.
